# Supplementary material for: Binding Studies of Aloe-Active Compounds with G-Quadruplex Sequences
Source: PubMed Central journal article supplement — ACS Omega. 2021 Jul 9;6(28):18344–51. doi: 10.1021/acsomega.1c02207 (PMC8296576; doi:10.1021/acsomega.1c02207), 2021-07-09
Supplement: ao1c02207_si_001.pdf [file ao1c02207_si_001.pdf]

## Supplementary Files

# Binding studies of aloe active compounds with G- quadruplex sequences

*Abhi Das\**, *Sanjay Dutta\**

Organic and Medicinal Chemistry Division,

CSIR-Indian Institute of Chemical Biology

Kolkata 700 032

## TABLE OF CONTENTS

**Figure S1: Absorption titration of aloe active compounds with quadruplex DNAs...Page 3**

**Figure S2: Fluorescence titration of aloe active compounds with quadruplex DNAs...Page 4**

**Figure S3: Thiozole orange displacement assay of aloe active compounds with quadruplex DNAs... Page 5**

**Table S1: Absorption titration data for the interaction of aloe active compounds with G-quadruplex DNAs... Page 6**

**Table S2: Fluorescence spectral data for the interaction of aloe active compounds with G-quadruplex DNAs... Page 7**

**Table S3: Thiazole orange displacement data for the interaction of aloe active compounds with G-quadruplex DNAs... Page 8**

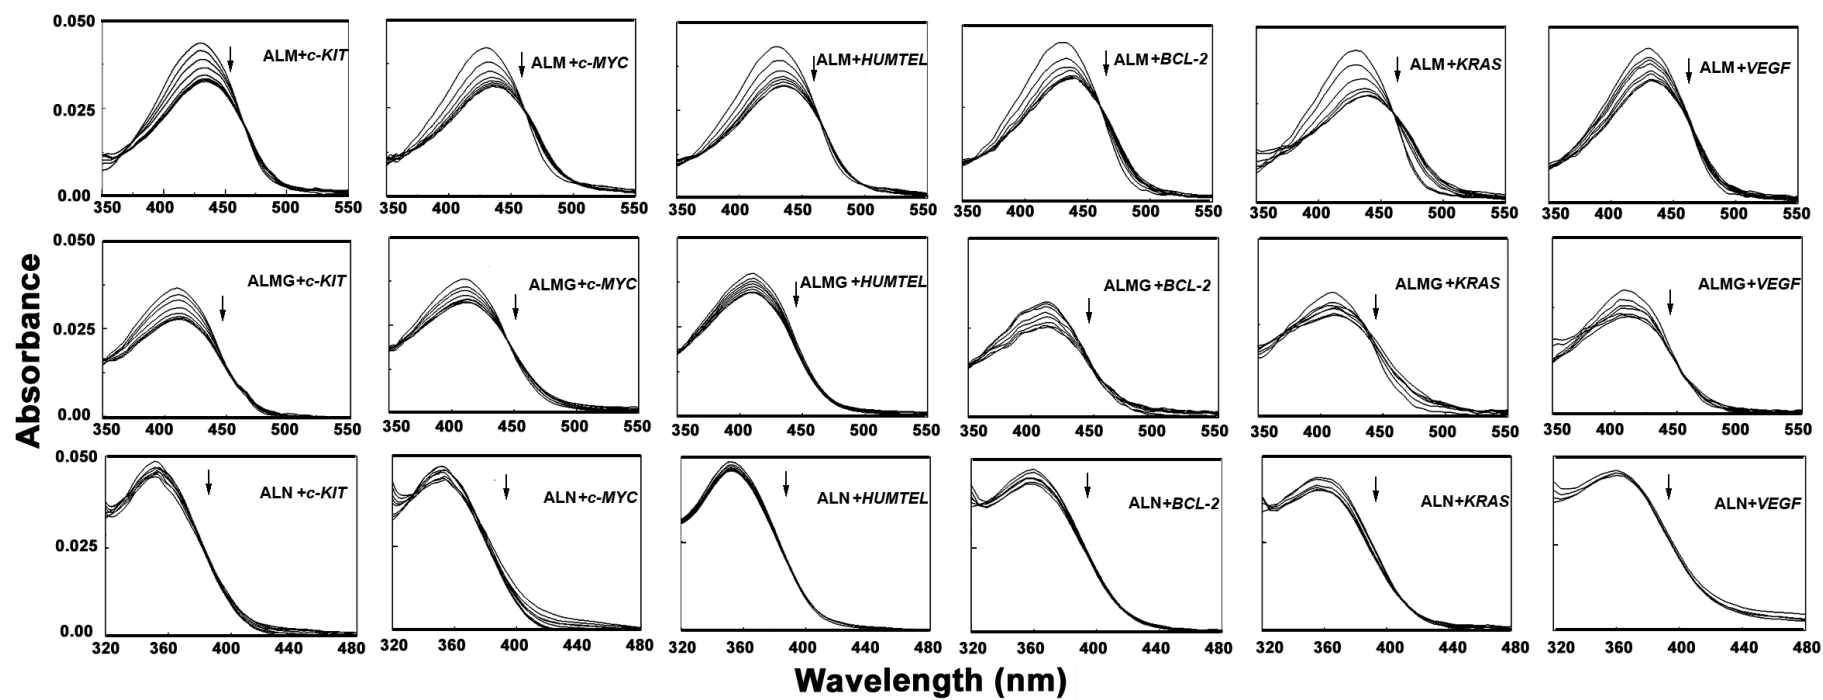

**Figure S1:** Absorption titration of aloe active compounds with quadruplex DNAs.

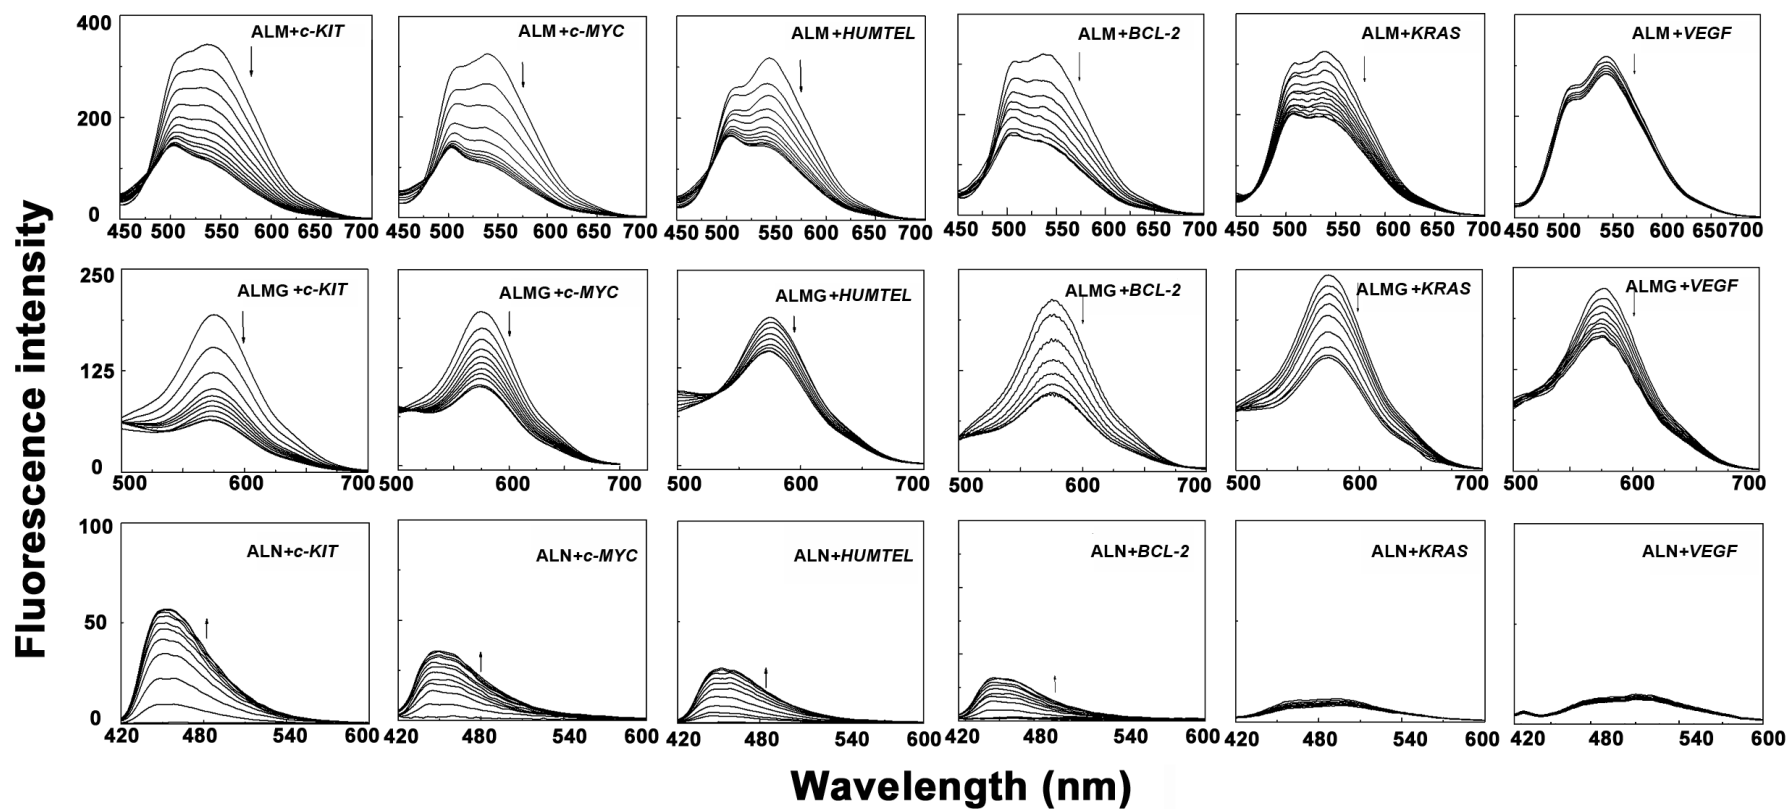

Figure S2: Fluorescence titration of aloe active compounds with quadruplex DNAs.

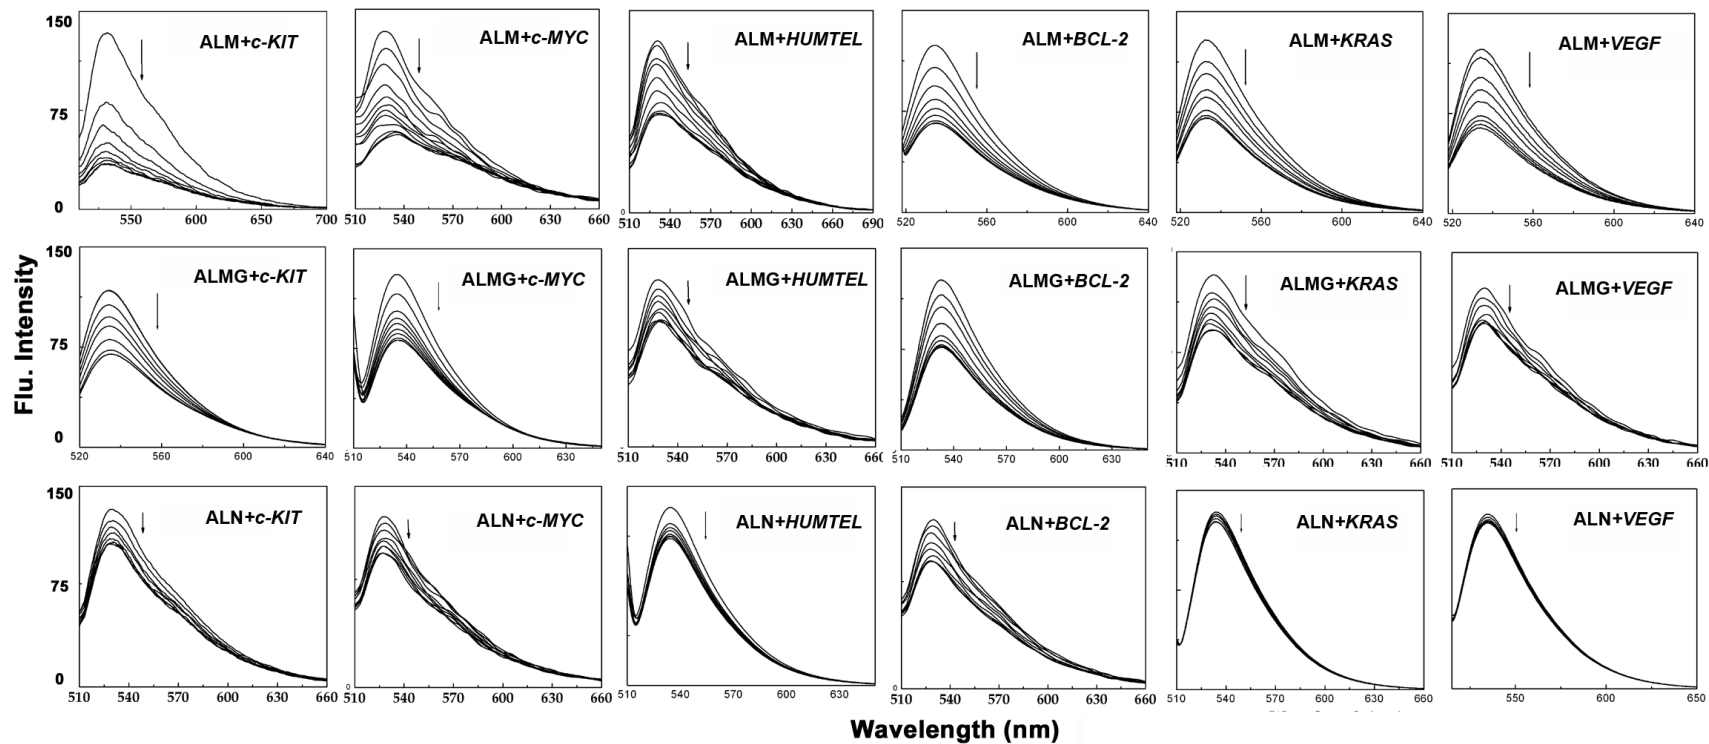

**Figure S3:** Thiozole orange displacement assay of aloe active compounds with quadruplex DNAs.

**Table S1: Absorption titration data for the interaction of aloe active compounds with G-quadruplex DNAs.**

|      |                                    | <i>c-KIT</i> | <i>c-MYC</i> | <i>HUMTEL</i> | <i>BCL-2</i> | <i>KRAS</i> | <i>VEGF</i> |
|------|------------------------------------|--------------|--------------|---------------|--------------|-------------|-------------|
| ALM  | Hypochormicity (%)                 | 24.53        | 25.6         | 25.9          | 22.89        | 29.5        | 21.4        |
|      | Bathochromic shifts (nm)           | 4            | 6            | 4             | 8            | 10          | 4           |
|      | Saturating DNA/Ligand ratio        | 27           | 30           | 35            | 32           | 40          | 45          |
|      | $K_i$ ( $10^5 \text{ M}^{-1}$ )    | 2.11±0.33    | 1.02±0.33    | 0.85±0.02     | 0.99±0.01    | 0.62±0.04   | 0.45±0.02   |
|      | n                                  | 8.13±0.34    | 4.2±0.44     | 6.5±0.45      | 5.8±0.20     | 8.2±0.34    | 7.5±0.64    |
| ALMG | Hypochormicity (%)                 | 24           | 18           | 12.8          | 22.36        | 18.85       | 21.26       |
|      | Bathochromic shifts (nm)           | 3            | 0            | 0             | 0            | 0           | 0           |
|      | Saturating DNA/Ligand ratio        | 32           | 36           | 45            | 40           | 45          | 55          |
|      | $K_i$ ( $10^4 \text{ M}^{-1}$ )    | 9.70±0.50    | 7.78±0.25    | 5.20±0.82     | 8.40±0.25    | 6.40±0.33   | 1.23±0.24   |
|      | n                                  | 5.42±0.44    | 5.54±0.30    | 3.63±0.46     | 6.25±0.28    | 4.26±0.34   | 6.30±0.15   |
| ALN  | Hypochormicity (%)                 | 6            | 5            | 4             | 5            | 4           | --          |
|      | Bathochromic shifts (nm)           | 0            | 0            | 0             | 0            | 0           | 0           |
|      | Saturating DNA/Ligand ratio        | --           | --           | -             | --           | --          | --          |
|      | $K_{BH}$ ( $10^3 \text{ M}^{-1}$ ) | 7.23±0.50    | 5.30±0.35    | 3.30±0.48     | 5.68±0.66    | 2.10±0.32   | --          |

**Table S2: Fluorescence spectral data for the interaction of aloe active compounds with G-quadruplex DNAs.**

|             |                                                               | <i>c-KIT</i> | <i>c-MYC</i> | <i>HUMTEL</i> | <i>BCL-2</i> | <i>KRAS</i> | <i>VEGF</i> |
|-------------|---------------------------------------------------------------|--------------|--------------|---------------|--------------|-------------|-------------|
| <b>ALM</b>  | <b>Quenching (%)</b>                                          | 67           | 66           | 54            | 53.4         | 38          | 10          |
|             | <b>Saturating DNA/Ligand ratio</b>                            | 28           | 32           | 35            | 35           | 42          | 50          |
|             | <b><math>K_i</math> (<math>10^5 \text{ M}^{-1}</math>)</b>    | 2.35±0.05    | 2.05±0.05    | 0.94±0.02     | 1.02±0.12    | 0.48±0.04   | 0.12±0.02   |
|             | <b>n</b>                                                      | 10.0±0.65    | 4.2±0.10     | 6.6±0.05      | 6.8±0.15     | 10.56±0.20  | 7.50±0.50   |
| <b>ALMG</b> | <b>Quenching (%)</b>                                          | 67           | 49           | 22.7          | 55           | 42          | 26          |
|             | <b>Saturating DNA/Ligand ratio</b>                            | 35           | 38           | 45            | 40           | 48          | 60          |
|             | <b><math>K_i</math> (<math>10^4 \text{ M}^{-1}</math>)</b>    | 8.85±0.23    | 8.20±0.20    | 2.64±0.05     | 8.32±0.10    | 7.50±0.56   | 2.02±0.25   |
|             | <b>n</b>                                                      | 4.22±0.05    | 5.70±0.48    | 4.32±0.80     | 7.16±0.65    | 5.54±0.22   | 6.40±0.50   |
| <b>ALN</b>  | <b><math>K_{BH}</math> (<math>10^3 \text{ M}^{-1}</math>)</b> | 7.60±0.34    | 3.52±0.25    | 3.80±0.55     | 3.22±0.30    | --          | --          |

**Table S3: Thiazole orange displacement data for the interaction of aloe active compounds with G-quadruplex DNAs.**

|             |                         | <i>c-KIT</i>   | <i>c-MYC</i>   | <i>HUMTEL</i>   | <i>BCL-2</i>    | <i>KRAS</i>    | <i>VEGF</i>    |
|-------------|-------------------------|----------------|----------------|-----------------|-----------------|----------------|----------------|
| <b>ALM</b>  | TO displacement %       | 74.50          | 61.00          | 43.08           | 45.16           | 45.98          | 47.82          |
|             | $K_D$ ( $\mu\text{M}$ ) | 2.3 $\pm$ 0.2  | 4.7 $\pm$ 0.4  | 12.3 $\pm$ 0.5  | 11.5 $\pm$ 0.8  | 22.3 $\pm$ 0.5 | 23.4 $\pm$ 0.8 |
| <b>ALMG</b> | TO displacement %       | 40.72          | 38.85          | 24.83           | 37.95           | 30.40          | 24.29          |
|             | $K_D$ ( $\mu\text{M}$ ) | 10.3 $\pm$ 0.5 | 16.3 $\pm$ 0.8 | 21.6 $\pm$ 0.5  | 11.9 $\pm$ 0.5  | 20.2 $\pm$ 0.2 | 81 $\pm$ 0.8   |
| <b>ALN</b>  | TO displacement %       | 22.08          | 21.43          | 20.38           | 21.13           | 5.94           | 5.27           |
|             | $K_D$ ( $\mu\text{M}$ ) | 93.5 $\pm$ 0.5 | 99.5 $\pm$ 0.4 | 106.6 $\pm$ 0.8 | 100.8 $\pm$ 0.6 | --             | --             |
